# Supplementary material for: Functional liquid layer enabled superior-performance of air purification filter
Source: Research Square preprint supplement (doi:10.21203/rs.3.rs-4290667/v1), 2024-06-07
Supplement: Supplementary file 1 [file 3219cd656a79cc6e37b50525.docx]

**Functional liquid layer enabled superior-performance of air purification filter**

Qifei Wang1,2, Yuheng Sheng1,2, Xiaowei Song1, Xiao Li3, Chao Shang3, Yang Wang1,2,* & Jihong Yu1,2,*

1State Key Laboratory of Inorganic Synthesis and Preparative Chemistry, College of Chemistry, Jilin University, Changchun 130012, P. R. China

2International Center of Future Science, Jilin University, Changchun 130012, P. R. China

3Changchun Veterinary Research Institute, Chinese Academy of Agricultural Sciences, Changchun 130122, China

**Table of Contents**

Supplementary Figure 1. The effectiveness of the plasma treatment. 3

Supplementary Figure 2. The effectiveness of the plasma treatment under external contaminations. 4

Supplementary Figure 3. The optimization of the functional liquid layer thickness. 4

Supplementary Figure 4. The stability performances of the LMS. 5

Supplementary Figure 5. The thermodynamic wetting models. 5

Supplementary Figure 6. The complexity of the contaminated particle generations. 6

Supplementary Figure 7. The continuous evolution of the pressure drop of the GMPPM. 6

Supplementary Figure 8. The filtration performances of the commercial respiratory facemasks. 7

Supplementary Figure 9. The effectiveness of the particle capture in different LMS. 8

Supplementary Figure 10. Antibacterial performances of optimal LMS. 8

Supplementary Figure 11. The reuse potential of the LMS. 9

Supplementary Table 1. The theoretical calculation of the liquid-matrix affinity. 10

Supplementary Table 2. The governing relationship for various functional liquid-fabric matrix systems.10

Supplementary Table 3. Surface tensions of the selected functional liquids. 10

Supplementary Table 4. The filtration performances of the LMS. 11

Supplementary Table 5. The stability and filtration performances of the LMS. 11

Supplementary Table 6. The wettability estimation test between the particles and functional liquids.12

Additional References 13


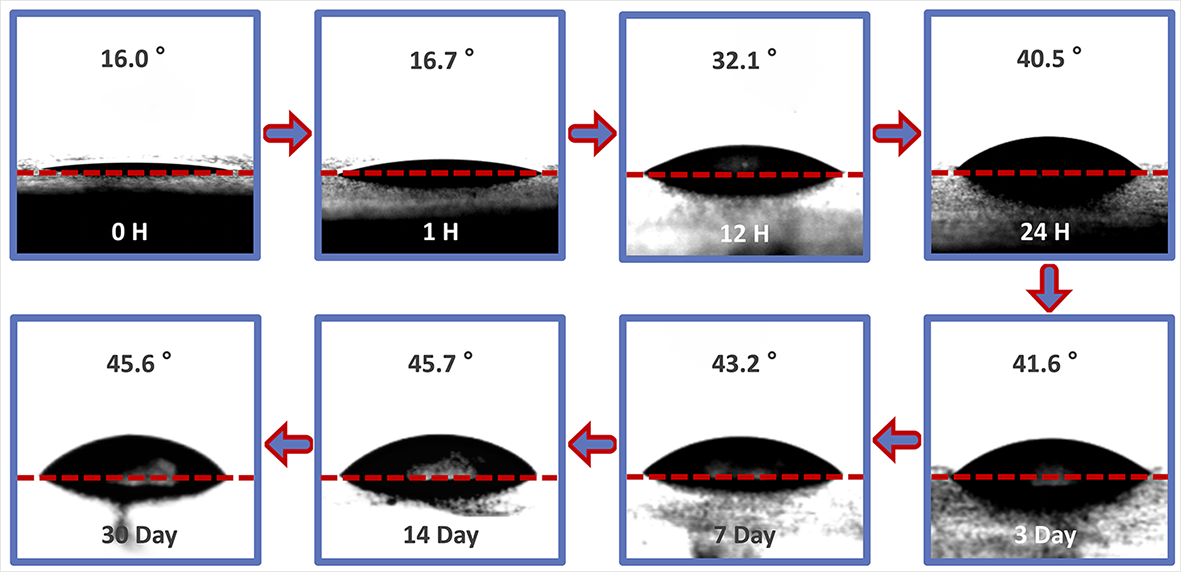


**Supplementary Figure 1. The effectiveness of the plasma treatment.** The plasma treatment tends to fail as reflected by the increase of the glycerol CA on the plasma-treated PPM within 30 days. The CA keeps increasing within 24 h from 16.0° to 40.5°. After 14 days, the CA remains at around 45.6° without external damage or contamination on the membrane surface. The whole process was conducted under none contamination and environmental change.

**
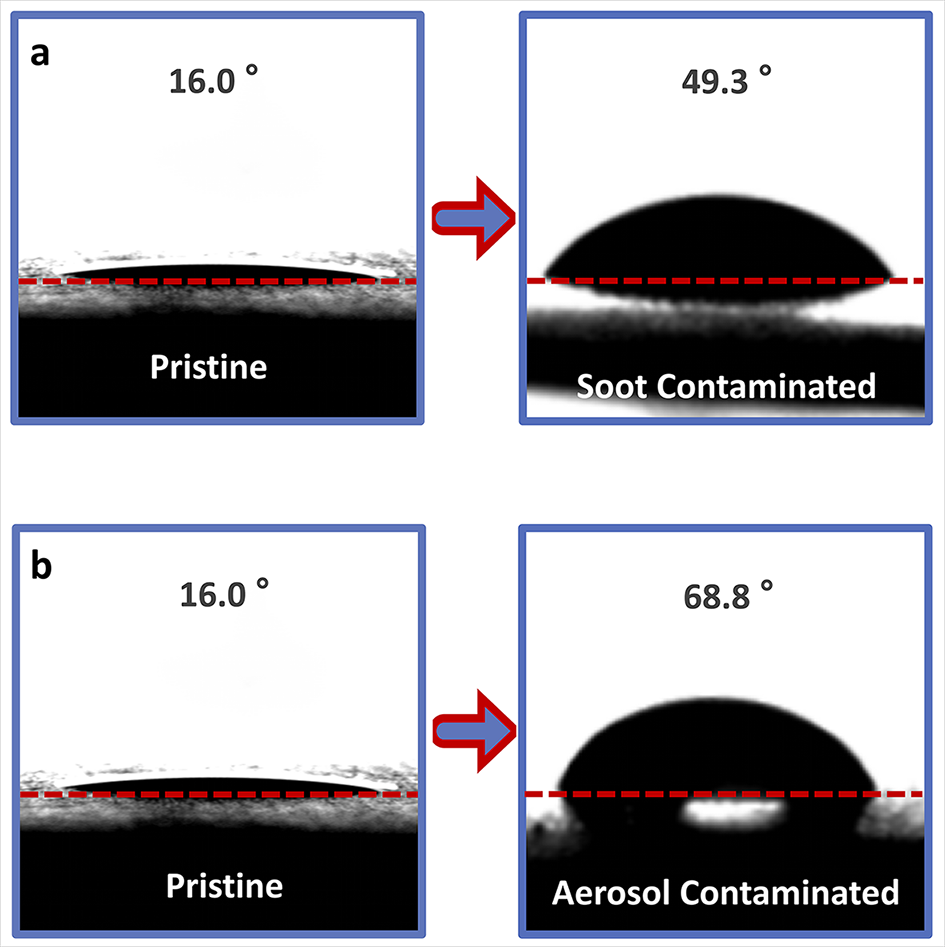
**

**Supplementary Figure 2. The effectiveness of the plasma treatment under external contaminations. a**, The plasma treatment fails after being contaminated with soot particles, causing the pristine CA of glycerol increasing to 49.3°. **b**, After the surface being contaminated by aerosol particles, the surface plasma treatment is destroyed, and the CA of glycerol increases to 68.8°. Such surface destruction results in the change of surface tension, displaying differences in the filtration performances (Extended Data Fig. 2e).

**
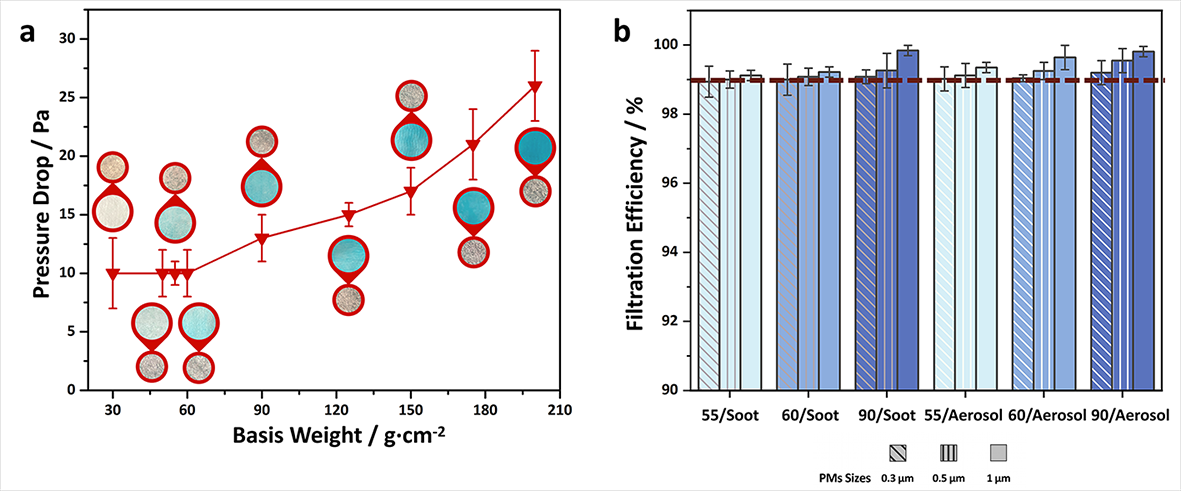
**

**Supplementary Figure 3. The optimization of the functional liquid layer thickness. a**, The thickness of the functional liquid layer leads to great impact on the filtration performances of the LMS, especially pressure drop. The increase of the liquid layer thickness is controlled by the basis weight of the whole LMS, and leads to the increase of the pressure drop. **b**, The filtration efficiencies of the LMS with different basis weights. The filtration efficiency clearly increases with the increasing of the amount of the loaded glycerol, and the filtration efficiencies can all reach over 99% with the basis weight over 55 g·m-2. Among all, the LMS with basis weight at 60 g·m-2 appears a trade-off between the filtration efficiency and the resistance, and ultimately be selected.

**
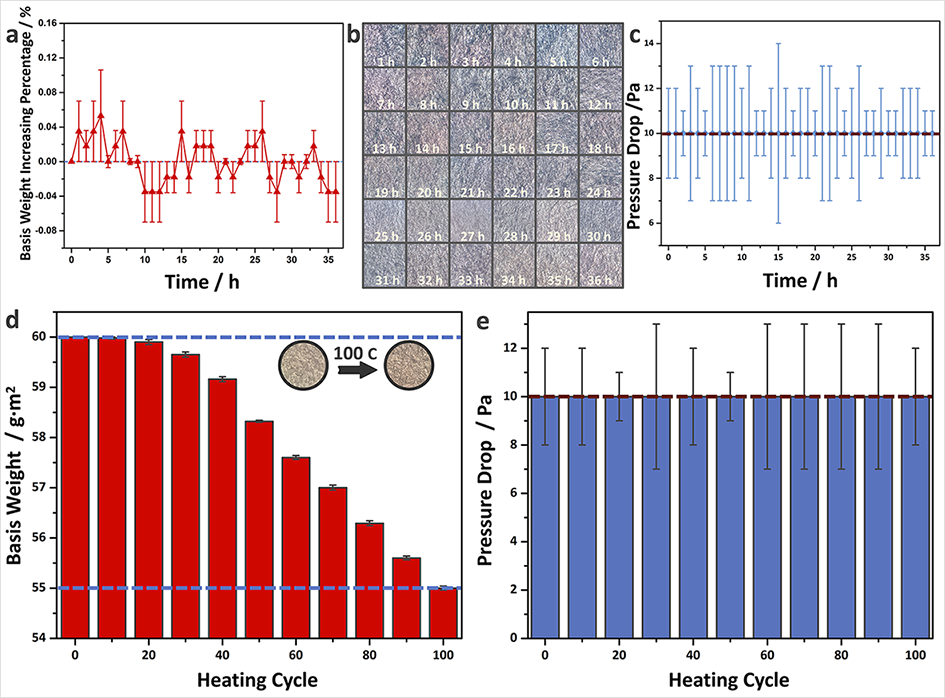
**

**Supplementary Figure 4. The stability performances of the LMS. a**, There is no obvious loss of the basis weight within a 36 h continuous wind flow test. The test was conducted under a high wind velocity at 5 L·min-1. b, The microscope images of the LMS within a 36 h continuous wind flow test. The overall morphology of the LMS stays the same, showing no clear appearances of the liquid bridges and blanks. **c**, The pressure drop remains unchanged after 36 h, also proving that the functional liquid layer cladding is highly stable. **d**, The loss of the basis weight under thermal treatment at 80 °C. After 100 heating cycles, the basis weight of the LMS drops to 55 g·m-2 with none morphology changes as shown in the inserted figures. According to the filtration efficiency test shown in Supplementary Fig. 3b, the filtration efficiency still achieves over 99%. **e**, The pressure drop remains unchanged, demonstrating the high thermal stability of the LMS.

**
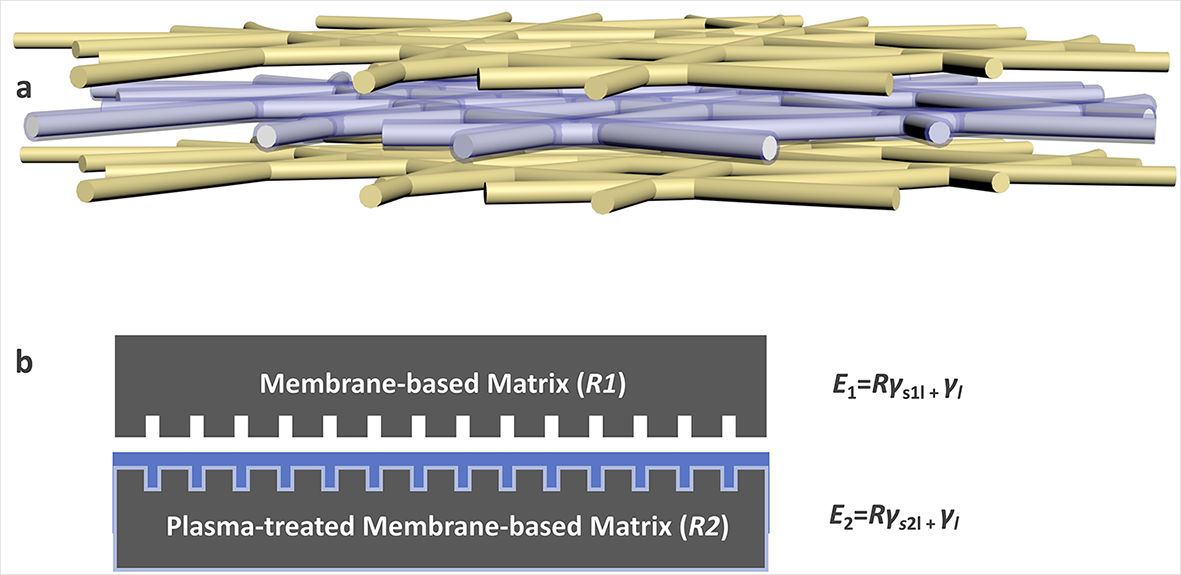
**

**Supplementary Figure 5. The thermodynamic wetting models1-4. a,** The sandwich structure of the membrane-based filters. The functional liquid mediated layer acts as the major filtering layer with the liquid media tightly clinging over the membrane fibers. The functional liquid mediated layer possesses high stability in thermodynamics, which promises that the functional liquid cannot transfer to other matrixes. **b,** The thermodynamic wetting model of the sandwich structure. The configurations **1** and **2** represent the states that the different membraned-based matrixes are sufficiently infused by the functional liquid, respectively.

**
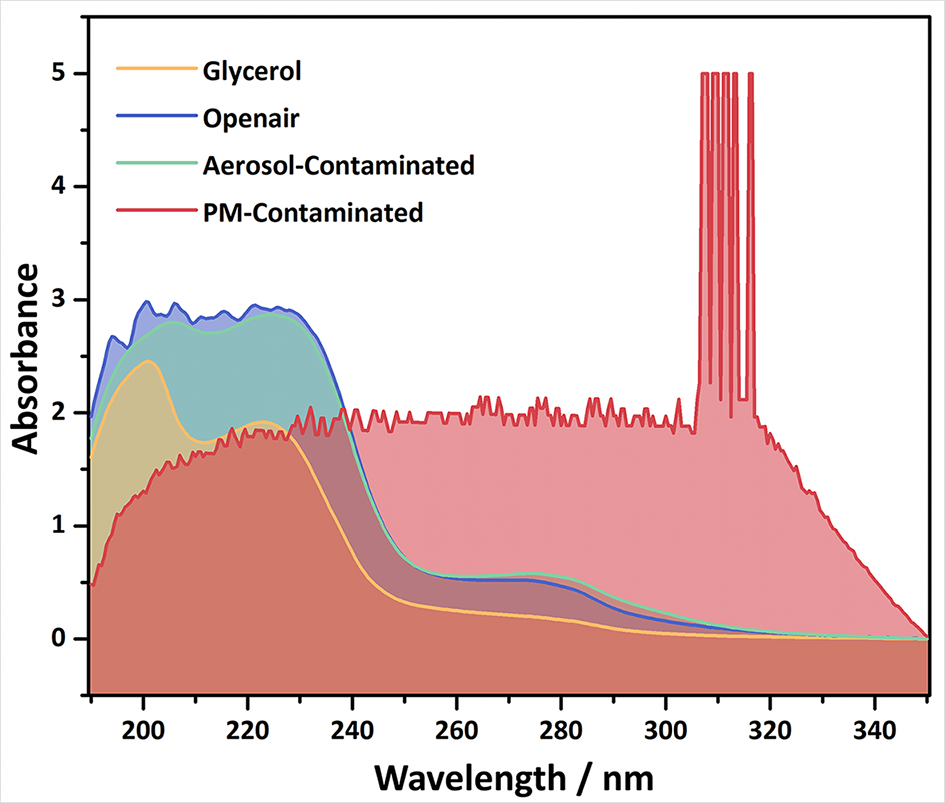
**

**Supplementary Figure 6. The complexity of the contaminated particle generations.** The comparison of the simulated gaseous contaminations and the realistic contaminations in the open environment. The complexity of the simulated gas contaminations demonstrates that the filtration experiments conducted by the LMPPM are valid, also ensuring the applicability of the LMS.


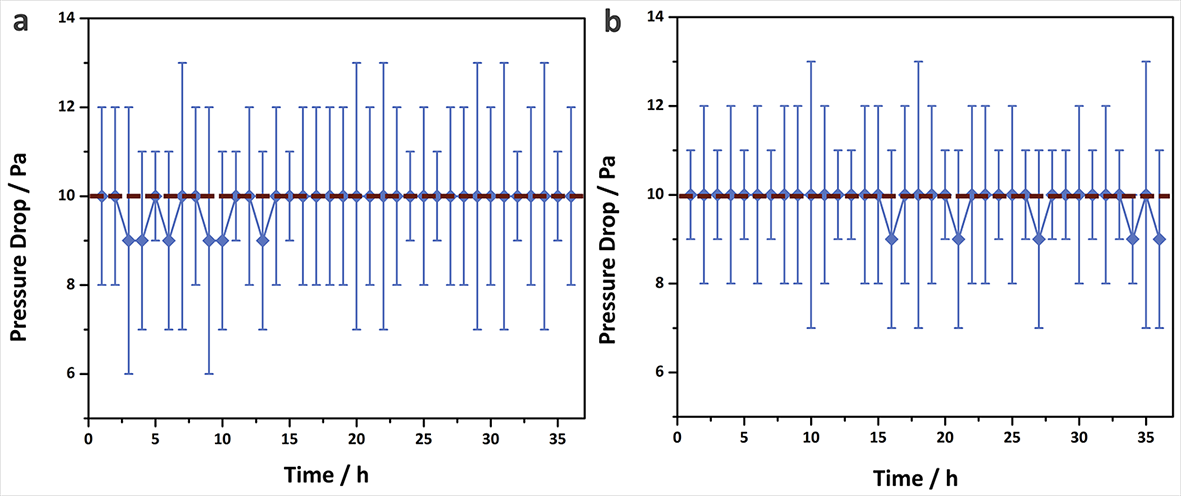


**Supplementary Figure 7. The continuous evolution of the pressure drop of the GMPPM.** A 36 h evolution of the glycerol-mediated PPM’s pressure drop targeted at **a,** soot particles and **b,** aerosol particles, respectively. The unchanged pressure drops well illustrate the anticlogging property of the LMS.

**
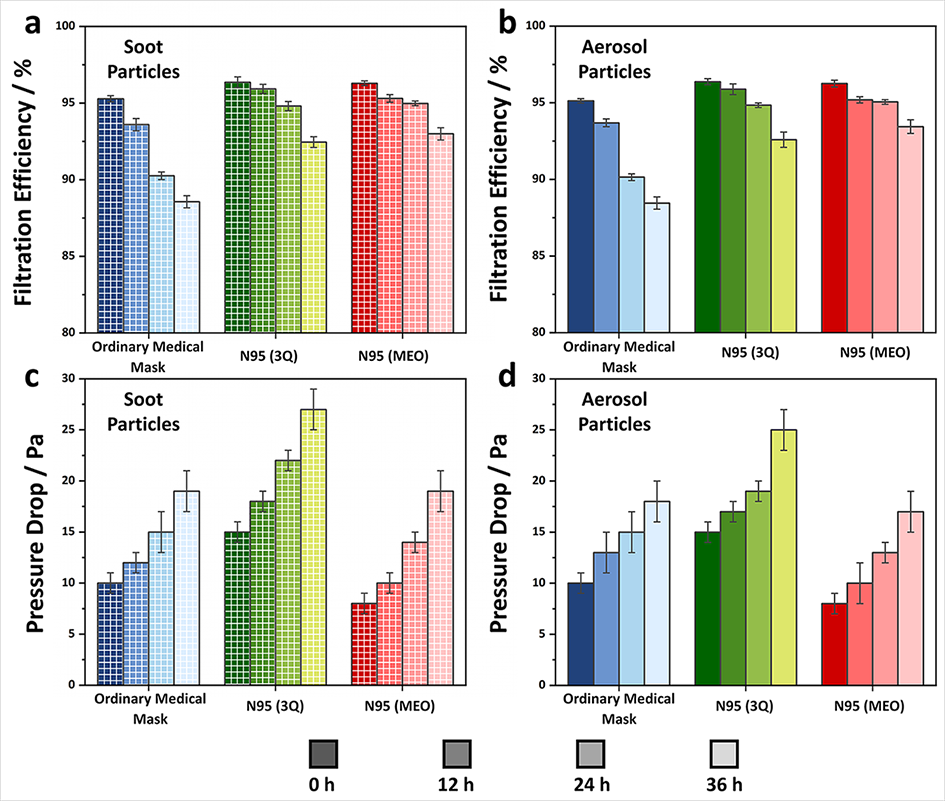
**

**Supplementary Figure 8. The filtration performances of the commercial respiratory facemasks.** A 36 h evolution of multiple commercial respiratory facemasks’ filtration characteristics at room temperature, filtration efficiencies for **a,** soot particles and **b,** aerosol particles and **c,** and **d,** the corresponding pressure drops. Due to the decay of the surface electrostatic charges, the filtration efficiencies would drastically decrease. For the ordinary medical masks, the weak physical barrier could not maintain the filtration efficiency over 90%. As for N95 respiratory facemasks, the filtration efficiencies also dropped below 95%. With the accumulation of the particles over the fibers and inside the pores, all corresponding pressure drops keep increasing in the 36 h.

**
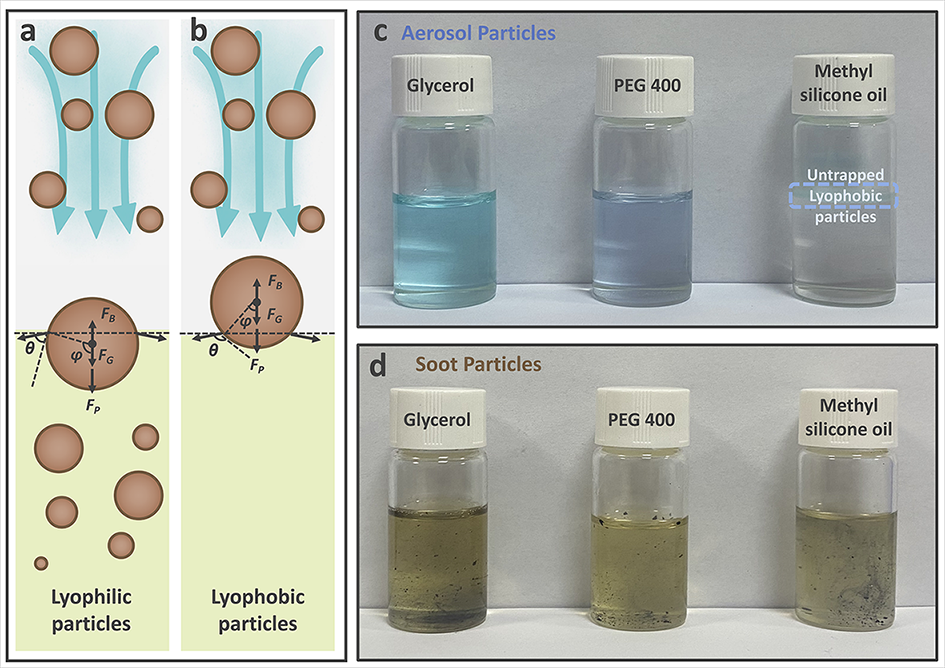
**

**Supplementary Figure 9. The effectiveness of the particle capture in different LMS.** Schematic representation of the adhesion and immersion processes for particles with **a** lyophilicity and **b** lyophobicity. **c,** The capture capability of different functional liquid targeted at aerosol particles. From left to right: glycerol, PEG 400 and methyl silicone oil. **d,** The capture capability of different functional liquid targeted at soot particles. From left to right: glycerol, PEG 400 and methyl silicone oil. The methyl silicone oil conducted LMS reveals selectivity on the particles, showing that the wetting behaviors of the particles to be filtered is important in the LMS.

**
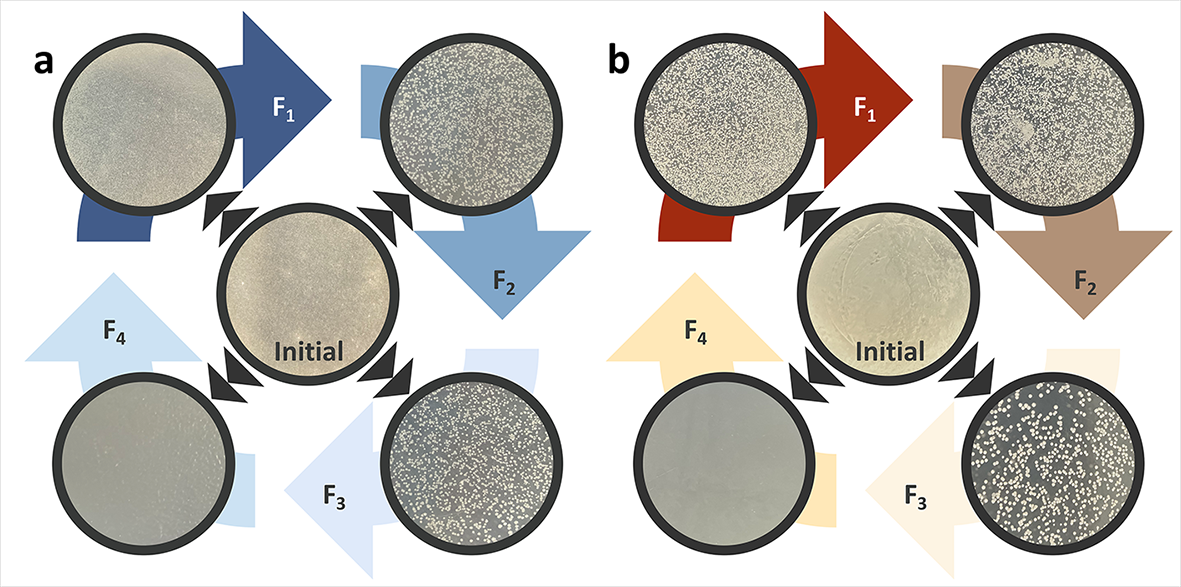
**

**Supplementary Figure 10. Antibacterial performances of optimal LMS. a,** Escherichia coli aerosol purification over PPM (F1), Ag@PPM (F2), GMPPM (F3) and Ag@GMPPM (F4). The aerosols after filtration were collected and coated on the solid LB medium to investigate the bacterial colony. **b,** Staphylococcus aureus aerosol purification over PPM (F1), Ag@PPM (F2), GMPPM (F3) and Ag@GMPPM (F4). When combining the Ag@PPM as the filter matrix and the glycerol as the functional liquid, there shows no bacterial colony on the medium (both F4), demonstrating that the optimal LMS exhibits extraordinary antibacterial ability.

**
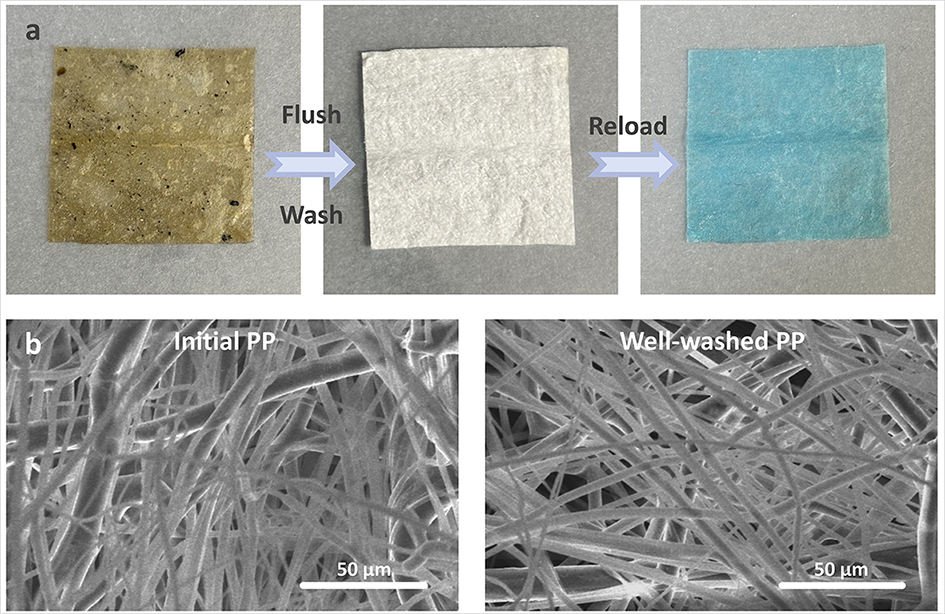
**

**Supplementary Figure 11. The reuse potential of the LMS. a,** The re-production process of the LMS. The contaminations can be easily washed out of the PPM, as PP fiber possesses weak attraction with the contaminations1. Most particles are held inside the liquid and can be washed out of the matrix with ethanol. And the oven-dried PPM can be reloaded with the fresh glycerol. **b,** The SEM images of the PPM matrix before filtration (left) and cleaned after being contaminated (right), revealing no damage on the surface.

**Supplementary Table 1. The theoretical calculation of the liquid-matrix affinity.** *E* is calculated based on the theoretical model shown in Supplementary Fig. S5. By introducing the Young’s Equation into the model, we have , thus minimizing the equation to measurable quantities as . The lower value of the E when glycerol binding with plasma-treated PP matrix indicates its much stronger affinity2-4.

| Cladding Models | *E* (mJ·m-2) |
| --- | --- |
| Glycerol with PP fiber | 134.56 |
| Glycerol with plasma-PP fiber | 1.95 |

**Supplementary Table 2. The governing relationship for various functional liquid-fabric matrix systems.** ∆*E* represents the total interfacial tension of the thermodynamic wetting models. The theoretical calculations demonstrate that the functional liquid (glycerol) clings stably on the filters and does not transfer to other matrixes.

| Condition | ∆*E* (mJ·m-2) |
| --- | --- |
| Room Temperature | -123.76 |
| 80 °C | -120.58 |
| Over 95% Humidity | -119.74 |
| PM-contaminated | -107.60 |
| Aerosol-contaminated | -133.21 |
| Open air-contaminated | -133.45 |

**Supplementary Table 3. Surface tensions of the selected functional liquids.** The surface tensions of the selected liquids were performed by the pendant droplet method at ambient conditions (temperature: 23-25 °C, relative humidity: 35-38 %).

| Functional liquid | (mN·m-1) |
| --- | --- |
| Methyl Silicon Oil | 23.70 ± 2.70 |
| PEG 400 | 49.33 ± 0.55 |
| Glycerol | 64.34 ± 0.05 |

**Supplementary Table 4. The filtration performances of the LMS.** The surface tensions of the selected liquids were performed by the pendant droplet method at ambient conditions (temperature: 23-25 °C, relative humidity: 35-38 %).

| Condition | (mN·m-1) | FE-Soot (%) | FE-Aerosol (%) |
| --- | --- | --- | --- |
| Pristine | 64.34 ± 0.05 | 99.02 ± 0.01 | 99.16 ± 0.02 |
| PM-contaminated-12h | 62.90 ± 0.13 | 99.02 ± 0.02 | ———— |
| PM-contaminated-24h | 60.20 ± 0.52 | 99.02 ± 0.01 | ———— |
| PM-contaminated-36h | 59.36 ± 0.30 | 99.03 ± 0.03 | ———— |
| Aerosol-contaminated-12h | 64.84 ± 0.10 | ———— | 99.14 ± 0.02 |
| Aerosol-contaminated-24h | 65.44 ± 0.57 | ———— | 99.18 ± 0.02 |
| Aerosol-contaminated-36h | 67.18 ± 0.81 | ———— | 99.15 ± 0.03 |
| Openair-contaminated-1 month | 65.64 ± 0.05 | 99.07 ± 0.05 | 99.14 ± 0.01 |
| Openair-contaminated-2 month | 66.87 ± 0.75 | 99.05 ± 0.02 | 99.17 ± 0.02 |
| Openair-contaminated-3 month | 67.78 ± 0.86 | 99.04 ± 0.03 | 99.15 ± 0.02 |

**Supplementary Table 5: The stability and filtration performances of the LMS.** The surface tensions of the glycerol liquids under different conditions were performed by the pendant droplet method at specified conditions shown in the list. The corresponding filtration characteristics were also tested under the same conditions.

| Condition | (mN·m-1) | FE-Soot (%) | FE-Aerosol (%) | Pressure Drop (Pa) |
| --- | --- | --- | --- | --- |
| 20 °C | 64.34 ± 0.05 | 99.02 ± 0.01 | 99.16 ± 0.02 | 10 ± 2 |
| 25 °C | 64.17 ± 0.43 | 99.04 ± 0.02 | 99.17 ± 0.02 | 10 ± 1 |
| 30 °C | 64.02 ± 0.59 | 99.04 ± 0.01 | 99.17 ± 0.04 | 10 ± 2 |
| 35 °C | 63.99 ± 0.71 | 99.06 ± 0.02 | 99.19 ± 0.03 | 10 ± 3 |
| 40 °C | 63.90 ± 0.17 | 99.08 ± 0.02 | 99.17 ± 0.03 | 10 ± 2 |
| 45 °C | 63.83 ± 0.57 | 99.06 ± 0.02 | 99.19 ± 0.02 | 10 ± 3 |
| 50 °C | 63.72 ± 0.29 | 99.05 ± 0.01 | 99.16 ± 0.01 | 10 ± 1 |
| 20-30 % | 64.32 ± 0.05 | 99.03 ± 0.01 | 99.19 ± 0.03 | 10 ± 2 |
| 30-40 % | 64.34 ± 0.17 | 99.05 ± 0.02 | 99.17 ± 0.02 | 10 ± 2 |
| 40-50 % | 64.39 ± 0.10 | 99.06 ± 0.03 | 99.17 ± 0.03 | 10 ± 2 |
| 50-60 % | 64.41 ±0.19 | 99. 06 ± 0.02 | 99.18 ± 0.02 | 10 ± 3 |
| 60-70 % | 64.47 ± 0.35 | 99.07 ± 0.02 | 99.18 ± 0.03 | 10 ± 1 |
| 70-80 % | 64.54 ± 0.59 | 99.09 ± 0.03 | 99.18 ± 0.02 | 10 ± 2 |
| > 95 % | 64.59 ± 0.11 | 99.12 ± 0.02 | 99.19 ± 0.02 | 10 ± 2 |

**Supplementary Table 6. The wettability estimation test between the particles and functional liquids.** The estimations were conducted through an immersion test. The lyophobic particles are hard to be immersed in the function liquid as shown in Supplementary Fig. 9. The general CAs between the particle accumulated surfaces and the functional liquids are listed below to reflect the wettabilities.

| Functional Liquid | Particle | CA (°) |
| --- | --- | --- |
| Glycerol | Soot | 68.7 |
|  | Aerosol | 49.4 |
| PEG 400 | Soot | 41.1 |
|  | Aerosol | 41.2 |
| Methyl silicone oil | Soot | 24.1 |
|  | Aerosol | 136.9 |

**Additional References**

1 Wang, Q. *et al.* Polarity‐dominated stable N97 respirators for airborne virus capture based on nanofibrous membranes. *Angew. Chem. Int. Ed.* **60**, 23756-23762 (2021).

2 Wong, T.-S. *et al.* Bioinspired self-repairing slippery surfaces with pressure-stable omniphobicity. *Nature* **477**, 443-447 (2011).

3 Wang, Y. *et al.* Infused-liquid-switchable porous nanofibrous membranes for multiphase liquid separation. *Nat. Commun.* **8**, 575 (2017).

4 Wang, Q. *et al.* Under-liquid dual superlyophobic nanofibrous polymer membranes achieved by coating thin-film composites: A design principle. *Chem. Sci.* **10**, 6382-6389 (2019).
